# Supplementary material for: Countering Protection Rackets Using Legal and Social Approaches: An Agent‐Based Test
Source: Hindawi journal article supplement (doi:10.1155/2018/3568085), 2018-01-01
Supplement: f1 [file 3568085.f1.docx]

**SUPPLEMENTARY INFORMATION**

Countering Protection Rackets using Legal and Social Approaches

An Agent-Based Test

**Table S.1. ODD+D Protocol for the Agent-Based Model of Protection Rackets**

Here we include the ODD+D protocol for our agent-based model of protection rackets including guiding questions for those who may be unfamiliar with the structure (Müller et al., 2013). This information supplements the description of the model in the paper.

| **Outline (🡪 template)** | | | **Guiding questions** | **Own ODD+D Model description** |
| --- | --- | --- | --- | --- |
| 1. **Overview** | | I.i Purpose | I.i.a What is the purpose of the study? | The purpose of the study is to test what are the independent and combined effects of legal and social approaches on the mafia and the rest of the population. |
| I.ii.b For whom is the model designed? | The model is designed to scientists and policy-makers interested in multi-disciplinary policing strategies to combat organized crime. |
| I.ii Entities, state variables, and scales | I.ii.a What kinds of entities are in the model? | - Mafia represents a mafia-type criminal organisation. - State corresponds to all governmental institutions that are involved in combating the mafia, such as police and the judicial system. Its main purpose is to eliminate the mafia through direct actions such as the imprisonment of its members, the seizure of its properties, and the supporting of the victims of extortion. - Entrepreneurs are producers, resellers, or providers of goods and services whose purpose is to make profit. - Consumers represent the civil society and they may purchase goods and contract services from entrepreneurs. - Non-Governmental Organisation (NGO) are civil society organisations, whose main goal is fighting mafia and promoting a “culture of legality” by publicising the negative effects that the Mafia has on the overall well-being of the society. |
| I.ii.b By what attributes (i.e. state variables and parameters) are these entities characterized? | - Mafia: number of Mafiosi, periodicity to request pizzo, extortion level, punishment severity, punishment probability, benefit, *pentiti* probability. - State: number of police officers, duration of general investigations, duration of specific investigations, duration of bureaucratic activities, probability to capture a Mafiosi, probability of finding incriminating evidences, duration of custody, conviction probability, imprisonment duration, time to assist, periodicity of increasing *Fondo di Solidarietà*, probability of spreading normative information, proportion of Consumers and Entrepreneurs target of social norms. - Entrepreneur: periodicity for receiving income, income, variation of income, product price, intrinsic risk inclination to report extortion, affiliation to NGO, individual and normative weights of social norms, salience of social norms, reputation Mafia as punisher, and reputation State as protector. - Consumer: periodicity to buy product, number of Entrepreneurs to search product price, Entrepreneur’s reputation, individual and normative weights of social norms, and salience of social norms. - NGO: probability of spreading of social norms, proportion of Consumers and Entrepreneurs target of social norms. |
| I.ii.c What are the exogenous factors / drivers of the model? | - Mafia: number of Mafiosi, periodicity to request pizzo, extortion level, punishment severity, punishment probability, benefit, *pentiti* probability. - State: number of police officers, duration of general investigations, duration of specific investigations, duration of bureaucratic activities, probability to capture a Mafiosi, probability of finding incriminating evidences, duration of custody, conviction probability, imprisonment duration, time to assist, periodicity of increasing *Fondo di Solidarietà*, probability of spreading normative information, proportion of Consumers and Entrepreneurs target of social norms. - Entrepreneur: periodicity for receiving income, income, variation of income, product price, intrinsic risk inclination to report extortion, and individual and normative weights of social norms. - Consumer: periodicity to buy product, number of Entrepreneurs to search product price, and individual and normative weights of social norms. - NGO: probability of spreading of social norms, proportion of Consumers and Entrepreneurs target of social norms. |
| I.ii.d If applicable, how is space included in the model? | The model does not represent space explicitly. Consumers and Entrepreneurs, however, are nodes in a scale-free network that defines their range of perception regarding actions of others. |
| I.ii.e What are the temporal and spatial resolutions and extents of the model? | Temporal resolution: the time units of the model do not have correspondence to a real time.  Spatial resolution: the model does not have space representation. |
| I.iii Process overview and scheduling | I.iii.a What entity does what, and in what order? | See *Section 2.1 Model overview* of the main text for a description about the actions and their ordering. Follow a summarised list of the agents’ actions unordered.  Mafia: Request *pizzo*, Benefit Entrepreneur, Punish Entrepreneur, Collaborate with the State  State: General Investigation, Specific Investigation, Imprison Mafioso, Assist Entrepreneur, and Social Norm Spread  Entrepreneur: Receive Income, Pay *pizzo*, Report *pizzo*, Collaborate with the State, Join NGO, Social Norm Spread, and Reputation Spread  Consumer: Shopping (e.g., purchase products), Social Norm Spread, and Reputation Spread  NGO: Social Norm Spread  Some actions are triggered based on an exogenous periodicity defined using probability distribution functions and others are reactions to some other action.  Periodic actions:   - Mafia: Request *pizzo* - State: General Investigation, Social Norm Spread - Entrepreneur: Receive Income - Consumer: Shopping - NGO: Social Norm Spread   Reactive actions:   - Mafia: Benefit Entrepreneur, Punish Entrepreneur, Collaborate with the State - State: Specific Investigation, Imprison Mafioso, Assist Entrepreneur - Entrepreneur: Pay pizzo, Report pizzo, Collaborate with the State. Join NGO, Social Norm Spread, and Reputation Spread - Consumer: Social Norm Spread and Reputation Spread - NGO: |
| 1. **Design Concepts** | | II.i Theoretical and Empirical Background | II.i.a Which general concepts, theories or hypotheses are underlying the model’s design at the system level or at the level(s) of the submodel(s) (apart from the decision model)? What is the link to complexity and the purpose of the model? | Social Norms (Conte, Andrighetto, & Campennì, 2013), rational choice theory (Gambetta, 1988, 1993; Schelling, 1971), and a cultural approach to understanding mafias (Arlacchi, 1988; Blok, 1974; Hess, 1973; Paoli, 2003; Schneider & Schneider, 1976, 2005). |
| II.i.b On what assumptions is/are the agents’ decision model(s) based? | Agents can be separated into two groups based on their decision-making complexity. The State, the Mafia, and the NGO are represented as agents whose decisions are based on fixed probabilities initialised at the start of the simulation. In contrast, Entrepreneurs and Consumers use more sophisticated reasoning abilities. They base their choices on a combination of instrumental and social considerations as reported in (Nardin et al., 2016, pp. 1125–1134). |
| II.i.c Why is a/are certain decision model(s) chosen? | The complexity of the State, the Mafia, and the NGO presents itself as a challenge to model in detail each of their decision-making processes. Several studies show that individuals are not driven only by economic motives, but in large part by social influences.  Additionally, we are interested in understanding how the combination of instrumental (i.e., coercive and economic) and social (i.e., social norms) policies influence human behaviours and how this impacts on protection rackets operation.  Thus, we define that Consumers and Entrepreneurs are central entities in the model whose decision-processes require further detailing. |
| II.i.d If the model / a submodel (e.g. the decision model) is based on empirical data, where does the data come from? | The decision model is based on a cognitive architecture that includes economic and social aspects (Andrighetto et al., 2013; Conte et al., 2013; Realpe-Gómez, Andrighetto, Nardin, & Montoya, 2018). No empirical data are used in the modelling phase.  We, however, extract some input parameter from empirical data:   1. the weights of the individual and normative drive was calibrated using data reported in different European Values Surveys (see Section 6 Interfacing Data and Simulation Model in Sartor (2015, pp. 29–55)). 2. a database of more than 600 cases of extortion in Sicily and Calabria during the past decade (https://datorium.gesis.org/xmlui/handle/10.7802/1116) |
| II.i.e At which level of aggregation were the data available? | The data were not aggregated. The European Values Surveys provided information about individual survey answers and the database of cases in Sicily contains information about each individual case reported. |
| II.ii Individual Decision Making | II.ii.a What are the subjects and objects of decision-making? On which level of aggregation is decision-making modeled? Are multiple levels of decision making included? | Please see item I.iii |
| II.ii.b What is the basic rationality behind agents’ decision-making in the model? Do agents pursue an explicit objective or have other success criteria? | Entrepreneurs decide to pay *pizzo* if they have an economic incentive (i.e., benefits + possible punishment) that surpasses the amount requested and the salience of the norm ‘Pay *pizzo* request’ is greater than the ‘Do not pay *pizzo* request’. Otherwise, Entrepreneurs decide not to pay *pizzo*.  Entrepreneurs report the *pizzo* request to the State if they decided not to pay *pizzo* and the chance of being protected by the State (i.e., reputation of the State as protector) exceeds the risk of being punished by the Mafia (i.e., reputation of the Mafia as punisher).  Consumers purchase products of Entrepreneurs who offer the lowest price, but also has a high reputation as a non *pizzo* payer. |
| II.ii.c How do agents make their decisions? | Please see (Nardin et al., 2016, pp. 1125–1134) for a detailed description of how agents make their decisions. |
| II.ii.d Do the agents adapt their behaviour to changing endogenous and exogenous state variables? And if yes, how? | Yes.  Entrepreneurs adapt their behaviour by adjusting their belief on the State protectiveness, Mafia punitiveness, and the salience of the norms.  Consumers adapt their behaviours by adjusting their belief on the Entrepreneurs reputation as *pizzo* payer and the salience of the norms. |
| II.ii.e Do social norms or cultural values play a role in the decision-making process? | Yes, social norms play an important role in the decision-making process. Please see Section 5.4 in (Nardin et al., 2016). |
| II.ii.f Do spatial aspects play a role in the decision process? | No |
| II.ii.g Do temporal aspects play a role in the decision process? | None |
| II.ii.h To which extent and how is uncertainty included in the agents’ decision rules? | The decision of some agents are already probabilistic like the State, the Mafia and the NGO.  Consumers and Entrepreneurs decision utility functions aggregate multiple factors and generate a value between 0 and 1, which is used as a threshold (i.e., probability) to compare against a randomly generate value and decide which action to perform.  For instance, an Entrepreneur calculates the probability of paying a *pizzo* request equals to 0.66. To decide whether to pay or not, the Entrepreneur draws a random number; if the number is less than 0.66 the Entrepreneur pays extortion, otherwise the Entrepreneur does not pay.  This decision structure, first, allows to account for uncertainty, but also eliminates the need for the designer to define fixed thresholds to each decision-making process. |
| II.iii Learning | II.iii.a Is individual learning included in the decision process? How do individuals change their decision rules over time as consequence of their experience? | The individuals change their behaviour depending on the beliefs about the State, Mafia and social environment, they learn by experience. However, there is not a change on the decision rules of the individual over time. |
| II.iii.b Is collective learning implemented in the model? | None |
| II.iv Individual Sensing | II.iv.a What endogenous and exogenous state variables are individuals assumed to sense and consider in their decisions? Is the sensing process erroneous? | Individuals do not sense variables, they sense actions performed by or affecting their immediate neighbours in the network. The actions’ information is propagated by the environment that considers some uncertainty on action propagation.  The affected variables are:   - Consumers: Entrepreneur’s reputation, and salience of social norms. - Entrepreneurs: salience of social norms, reputation Mafia as punisher, and reputation State as protector. |
| II.iv.b What state variables of which other individuals can an individual perceive? Is the sensing process erroneous? | None |
| II.iv.c What is the spatial scale of sensing? | Immediate neighbours in a free-scale network. |
| II.iv.d Are the mechanisms by which agents obtain information modeled explicitly, or are individuals simply assumed to know these variables? | Sensing is local only. However, Consumers and Entrepreneurs can receive communication messages from the State, the NGO, and other Consumers and Entrepreneurs (i.e., their neighbours in the network). These messages also lead to the update of the variables indicated in item II.iv.a. |
| II.iv.e Are costs for cognition and costs for gathering information included in the model? | None |
| II.v Individual Prediction | II.v.a Which data uses the agent to predict future conditions? | None |
| II.v.b What internal models are agents assumed to use to estimate future conditions or consequences of their decisions? | None |
| II.v.c Might agents be erroneous in the prediction process, and how is it implemented? | None |
| II.vi Interaction | II.vi.a Are interactions among agents and entities assumed as direct or indirect? | Both, direct and Indirect |
| II.vi.b On what do the interactions depend? | Interactions depend on sensing and communication. |
| II.vi.c If the interactions involve communication, how are such communications represented? | These communications are represented as pre-defined messages exchanged among agents. |
| II.vi.d If a coordination network exists, how does it affect the agent behaviour? Is the structure of the network imposed or emergent? | The structure of the network is imposed and static. The network used is a scale-free network that interconnects Consumers and Entrepreneurs. The network defines the range of perception of the agents, but not directly their behaviour. |
| II.vii Collectives | II.vii.a Do the individuals form or belong to aggregations that affect, and are affected by, the individuals? Are these aggregations imposed by the modeller or do they emerge during the simulation? | No |
| II.vii.b How are collectives represented? | No |
| II.viii Heterogeneity | II.viii.a Are the agents heterogeneous? If yes, which state variables and/or processes differ between the agents? | No |
| II.viii.b Are the agents heterogeneous in their decision-making? If yes, which decision models or decision objects differ between the agents? | No, the decision-making structure is the same to all agents of the same type. |
| II.ix Stochasticity | II.ix.a What processes (including initialization) are modeled by assuming they are random or partly random? | The processes that are random or partly random are:  Mafia   - Decision to the next *pizzo* request and whom to request from - Decision to punish non-*pizzo* payer Entrepreneurs - Decision to collaborate with the State (i.e., become *pentito*)   State   - Duration of general investigation - Initiate a specific investigation - Duration of specific investigation - Duration of bureaucratic activities - Capture a Mafioso - Duration of custody - Decision to convict a Mafioso - Duration of imprisonment - Decision to assist a punished Entrepreneur - Time between recharge of the *Fondo di Solidarietà*   Entrepreneur   - Decision to pay *pizzo* - Decision to report *pizzo* request - Decision to report punishment - Time between receiving wage - Decide collaborate to the State - Decision to join NGO   Consumer   - Decision whom to buy a product from - Time between purchases   NGO   - Time to accept the affiliation of an Entrepreneur - Decision to spread social norms |
| II.x Observation | II.x.a What data are collected from the ABM for testing, understanding, and analyzing it, and how and when are they collected? | A set of output data files are generated as the result of their execution of the model, please refer to Section 4.1.7 (Nardin, Andrighetto, Székely, & Troitzsch, 2015) for a complete list of output data collected. |
| II.x.b What key results, outputs or characteristics of the model are emerging from the individuals? (Emergence) | The keys results emerging from the model are reported in the Results section of the main text, which consider the following outcomes:   - the imprisonment of Mafiosi, - the efficiency of the State at imprisoning Mafiosi, - *pizzo* requests and punishments meted out by the Mafia, - *pizzo* paying and reporting by Entrepreneurs, and - the social norms’ saliences of Entrepreneurs. |
| 1. **Details** | | II.i Implementation Details | III.i.a How has the model been implemented? | The model is implemented using Java |
| III.i.b Is the model accessible and if so where? | Yes, the model implementation is available at <https://github.com/LABSS/gloderss> |
| III.ii Initialization | III.ii.a What is the initial state of the model world, i.e. at time t=0 of a simulation run? | The initial values of the model’s parameters to each treatment reported in the main text is available in Table S.2. |
| III.ii.b Is initialization always the same, or is it allowed to vary among simulations? | See Table A1 in the main text. The values vary among treatments, but they are the same when running replications of the same treatment in which only the random seed changes. |
| III.ii.c Are the initial values chosen arbitrarily or based on data? | Some initial values like Mafia’s extortion level, and Consumers’ and Entrepreneurs’ Individual and Normative weights were chosen based on empirical data, while the other values were chosen arbitrarily. However, we show that the chosen values reproduces macro-patterns observed in Sicily in the last decade (see Figure 2 in the main text). |
|  | III.iii Input Data | III.iii.a Does the model use input from external sources such as data files or other models to represent processes that change over time? | No external data are used in the model. |
| III.iv Submodels | III.iv.a What, in detail, are the submodels that represent the processes listed in ‘Process overview and scheduling’? | None |
| III.iv.b What are the model parameters, their dimensions and reference values? | None |
| III.iv.c How were submodels designed or chosen, and how were they parameterized and then tested? | None |

**Table S.2. Initial value of the parameters of each agent type for each treatment. Yellow rows indicate that the value changes among treatments.**

| **AGENT PARAMETERS** | **TREATMENT** | | | |
| --- | --- | --- | --- | --- |
| **B** | **LA** | **SA** | **CA** |
| **CONSUMER** |  |  |  |  |
| Number of Consumers | 200 | 200 | 200 | 200 |
| Time between Purchase | NORMAL(30,10) | NORMAL(30,10) | NORMAL(30,10) | NORMAL(30,10) |
| Number of Entrepreneurs to Research | 5 | 5 | 5 | 5 |
|  |  |  |  |  |
| Initial Entrepreneurs Reputation as Not Payer | 0.00 | 0.00 | 0.00 | 0.00 |
| Entrepreneurs Threshold to consider as Not Payer | 0.00 | 0.00 | 0.00 | 0.00 |
|  |  |  |  |  |
| Sanction Threshold | 0.90 | 0.90 | 0.90 | 0.90 |
| Sanction Discernibility | 0.10 | 0.10 | 0.10 | 0.10 |
|  |  |  |  |  |
| Individual Weight | 0.50 | 0.50 | 0.50 | 0.50 |
| Normative Weight | 0.50 | 0.50 | 0.50 | 0.50 |
|  |  |  |  |  |
| Norm Pay Extortion | 0.93 | 0.93 | 0.93 | 0.93 |
| Norm Not Pay Extortion | 0.07 | 0.07 | 0.07 | 0.07 |
| Norm Denounce | 0.07 | 0.07 | 0.07 | 0.07 |
| Norm Not Denounce | 0.93 | 0.93 | 0.93 | 0.93 |
| Norm Buy from Paying Entrepreneur | 0.50 | 0.50 | 0.50 | 0.50 |
| Norm Buy from Not Paying Entrepreneur | 0.50 | 0.50 | 0.50 | 0.50 |
|  |  |  |  |  |
| **ENTREPRENEUR** |  |  |  |  |
| Number of Entrepreneurs | 100 | 100 | 100 | 100 |
| Wage Periodicity | NORMAL(30,2) | NORMAL(30,2) | NORMAL(30,2) | NORMAL(30,2) |
| Minimum Wage | 500 | 500 | 500 | 500 |
| Maximum Wage | 1000 | 1000 | 1000 | 1000 |
| Wage Variation | 0.50 | 0.50 | 0.50 | 0.50 |
| Minimum Price | 50 | 50 | 50 | 50 |
| Maximum Price | 100 | 100 | 100 | 100 |
|  |  |  |  |  |
| Denounce Alpha | 0.50 | 0.50 | 0.50 | 0.50 |
|  |  |  |  |  |
| Collaboration Probability | 0.10 | 0.10 | 0.10 | 0.10 |
|  |  |  |  |  |
| Affiliate Threshold | 1 | 1 | 1 | 1 |
| Affiliated Entrepreneurs | 0.00 | 0.00 | 0.00 | 0.00 |
|  |  |  |  |  |
| Reputation State Protector | 0.10 | 0.10 | 0.10 | 0.10 |
| Reputation State Punisher | 0.10 | 0.10 | 0.10 | 0.10 |
| Reputation Mafia Punisher | 0.90 | 0.90 | 0.90 | 0.90 |
|  |  |  |  |  |
| Individual Weight | 0.50 | 0.50 | 0.50 | 0.50 |
| Normative Weight | 0.50 | 0.50 | 0.50 | 0.50 |
|  |  |  |  |  |
| Norm Pay Extortion | 0.93 | 0.93 | 0.93 | 0.93 |
| Norm Not Pay Extortion | 0.07 | 0.07 | 0.07 | 0.07 |
| Norm Denounce | 0.07 | 0.07 | 0.07 | 0.07 |
| Norm Not Denounce | 0.93 | 0.93 | 0.93 | 0.93 |
|  |  |  |  |  |
| **STATE** |  |  |  |  |
| Number of Police Officers | 20 | 20 | 20 | 20 |
|  |  |  |  |  |
| General Investigation Duration | NORMAL(10,5) | NORMAL(100,10) | NORMAL(10,5) | NORMAL(100,10) |
| Bureaucratic Activities Duration | NORMAL(100,5) | NORMAL(50,10) | NORMAL(100,5) | NORMAL(50,10) |
| Specific Investigation Duration | NORMAL(10,5) | NORMAL(300,10) | NORMAL(10,5) | NORMAL(300,10) |
| Specific Investigation Probability | 0.20 | 0.80 | 0.20 | 0.80 |
| Capture Probability | 0.20 | 0.80 | 0.20 | 0.80 |
| Evidence Probability | 0.01 | 0.20 | 0.01 | 0.20 |
|  |  |  |  |  |
| Custody Duration | CONSTANT(10) | CONSTANT(150) | CONSTANT(10) | CONSTANT(150) |
| Conviction Probability | 0.10 | 0.60 | 0.10 | 0.60 |
| Imprisonment Duration | NORMAL(100,5) | NORMAL(500,100) | NORMAL(100,5) | NORMAL(500,100) |
|  |  |  |  |  |
| No Collaboration Punishment Probability | 0.10 | 0.30 | 0.10 | 0.30 |
| No Collaboration Punishment | 0.10 | 0.50 | 0.10 | 0.50 |
|  |  |  |  |  |
| Time to Compensation | CONSTANT(50) | CONSTANT(50) | CONSTANT(50) | CONSTANT(50) |
| Fondo di Solidarieta | 0 | 4000 | 0 | 4000 |
| Recharge Fondo di Solidarieta | NORMAL(500,100) | NORMAL(500,100) | NORMAL(500,100) | NORMAL(500,100) |
| Proportion Transfer Mafia Resources to Fondo | 0.00 | 0.50 | 0.00 | 0.50 |
|  |  |  |  |  |
| Spread Information Function | CONSTANT(200) | CONSTANT(200) | CONSTANT(200) | CONSTANT(200) |
| Proportion of Consumers | 0.00 | 0.00 | 0.00 | 0.05 |
| Proportion of Entrepreneurs | 0.00 | 0.00 | 0.00 | 0.05 |
|  |  |  |  |  |
| **MAFIA** |  |  |  |  |
| Number of Mafiosi | 20 | 20 | 20 | 20 |
| Demand Periodicity | NORMAL(10,2) | NORMAL(10,2) | NORMAL(10,2) | NORMAL(10,2) |
| Demand Affiliated Probability | 1.00 | 1.00 | 1.00 | 1.00 |
|  |  |  |  |  |
| Extortion Level | 0.10 | 0.10 | 0.10 | 0.10 |
| Punishment Severity | 0.75 | 0.75 | 0.75 | 0.75 |
| Punishment Probability | 0.90 | 0.90 | 0.90 | 0.90 |
|  |  |  |  |  |
| Minimum Benefit | 0.00 | 0.00 | 0.00 | 0.00 |
| Maximum Benefit | 0.10 | 0.10 | 0.10 | 0.10 |
| Pentiti Probability | 0.00 | 0.00 | 0.00 | 0.00 |
|  |  |  |  |  |
| **NON-GOVERNMENTAL ORGANIZATION** |  |  |  |  |
| Time to Affiliate | NORMAL(200,5) | NORMAL(200,5) | NORMAL(200,5) | NORMAL(200,5) |
|  |  |  |  |  |
| Spread Information Function | tanh(#{NUMBER_ACTIONS},0.1) | tanh(#{NUMBER_ACTIONS},0.1) | tanh(#{NUMBER_ACTIONS},0.1) | tanh(#{NUMBER_ACTIONS},0.1) |
| Proportion of Consumers | 0.00 | 0.00 | 0.10 | 0.10 |
| Proportion of Entrepreneurs | 0.00 | 0.00 | 0.10 | 0.10 |


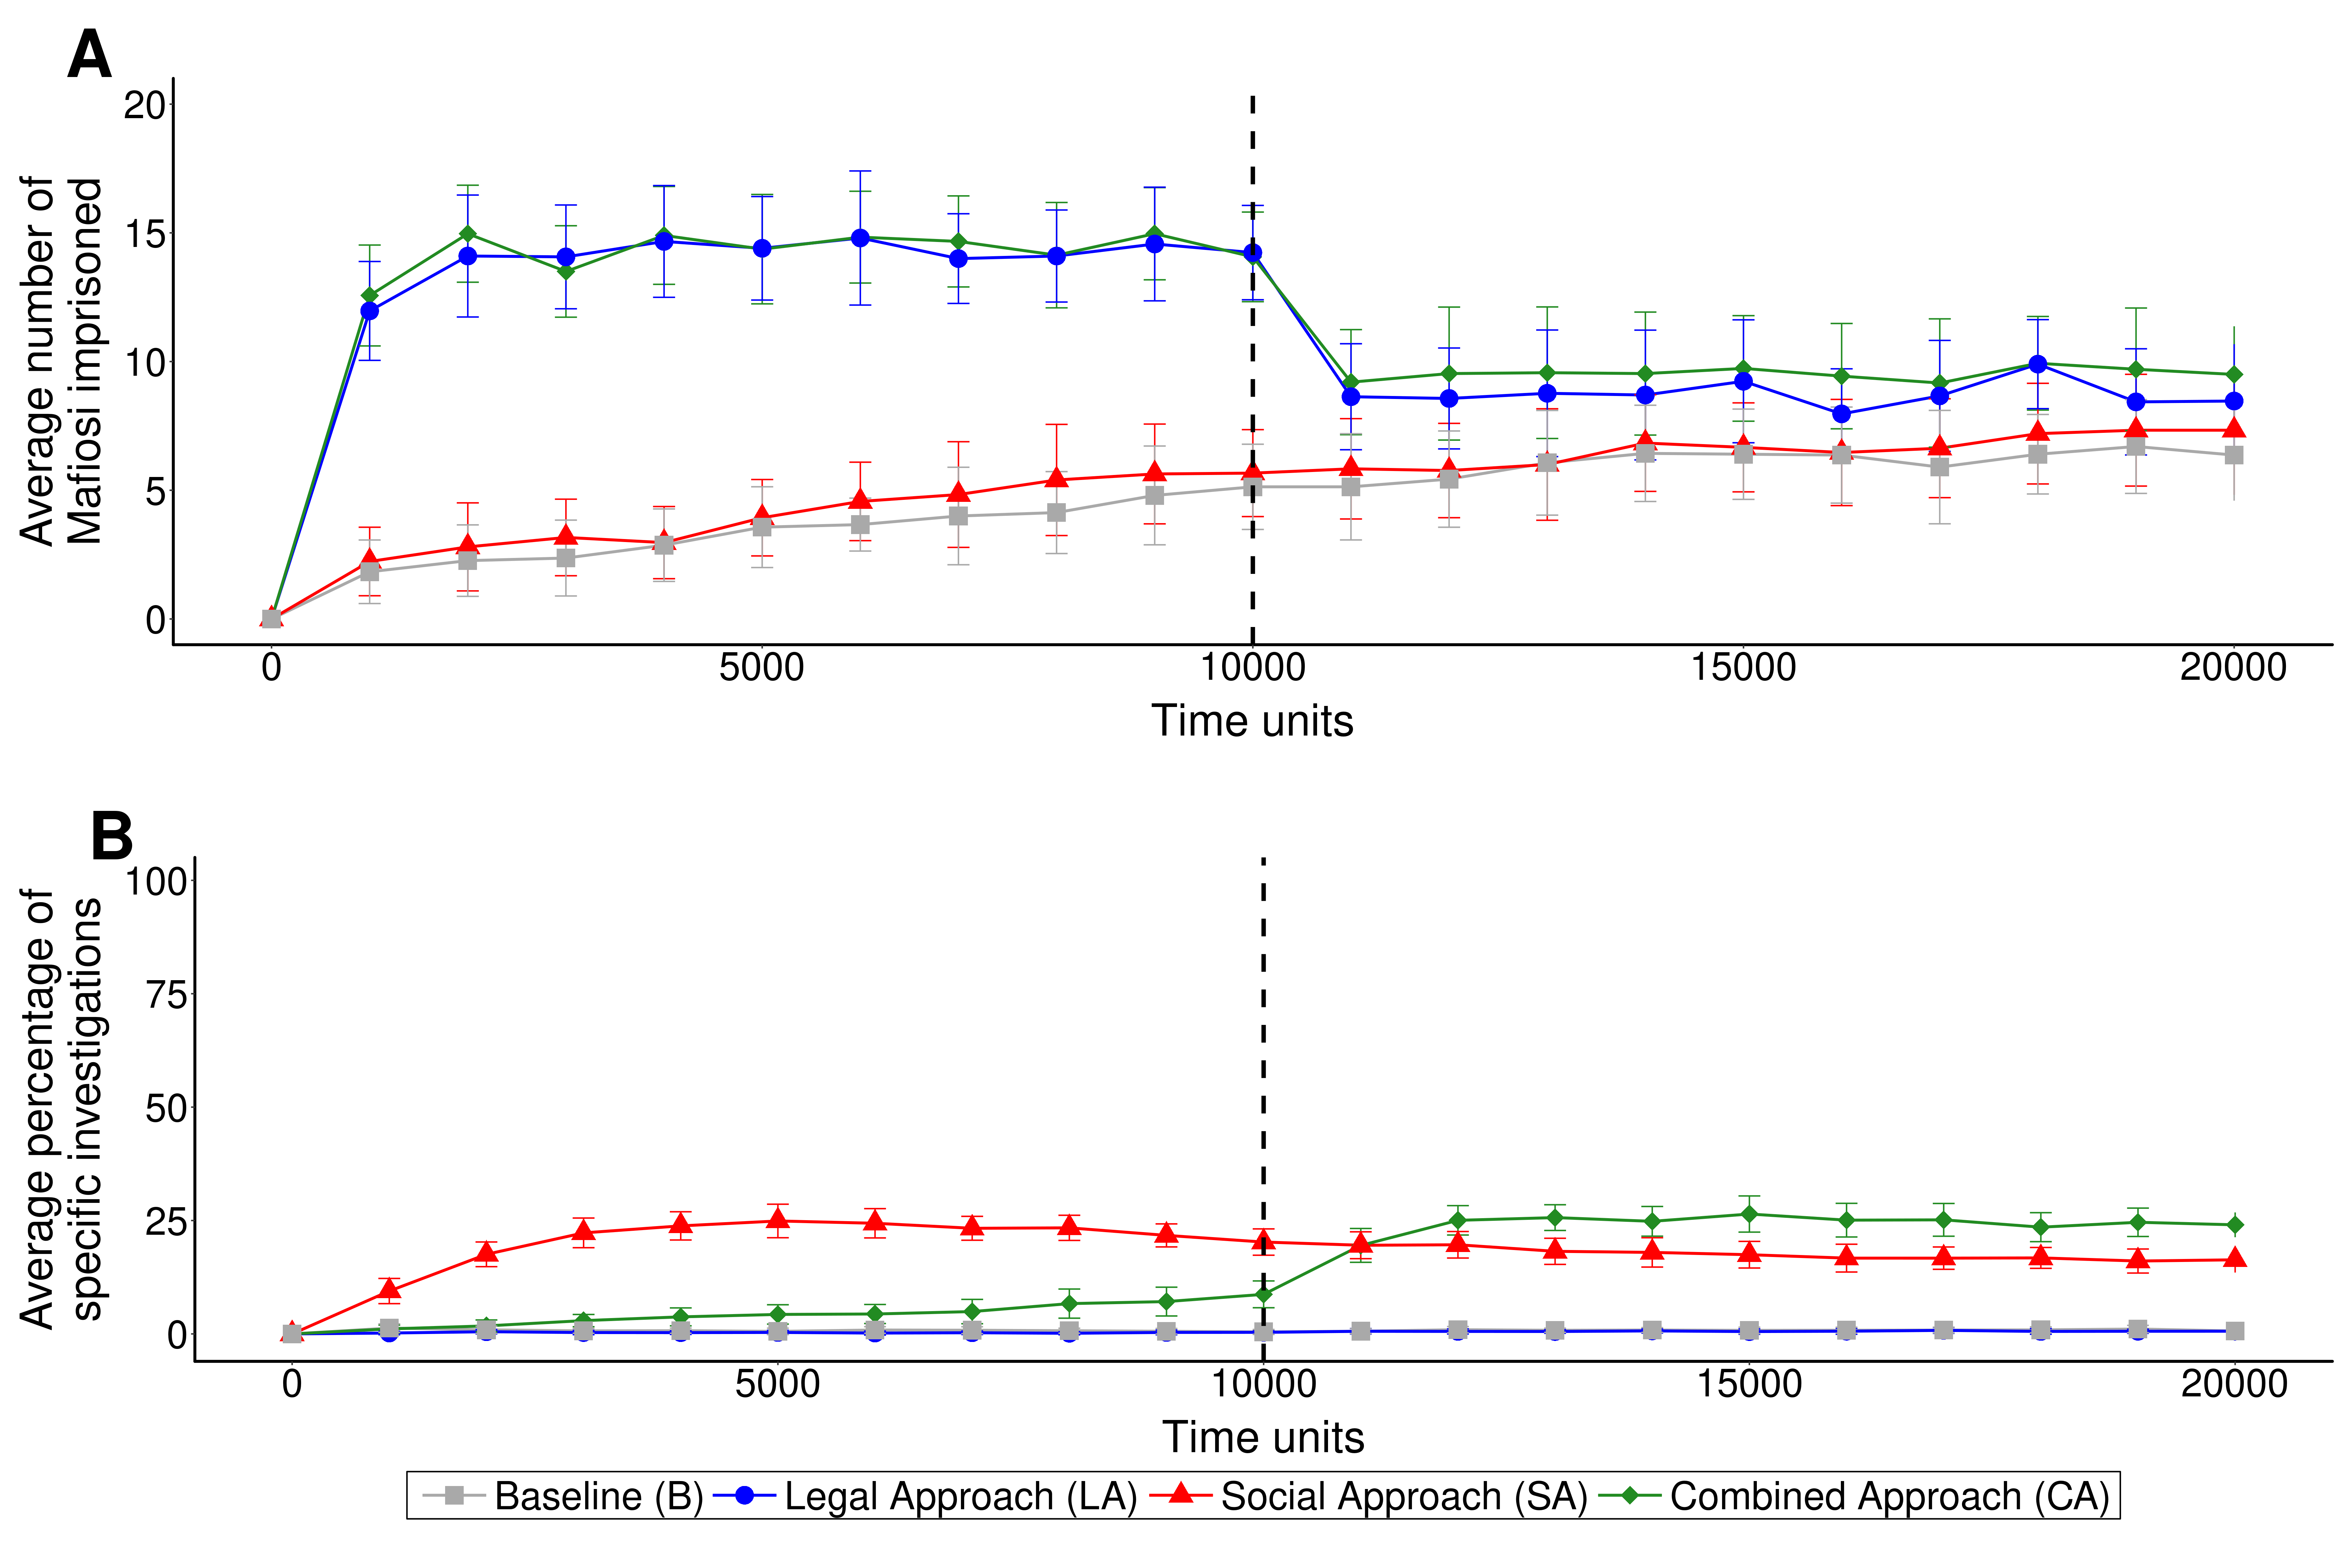


Figure S.1. Mafia imprisonment. Means plotted and error bars indicate ±1 standard deviation. (A) The number of Mafiosi (out of 20) imprisoned in each treatment and (B) proportion of investigations that are specific investigations. The dashed line indicates the change to baseline parameters


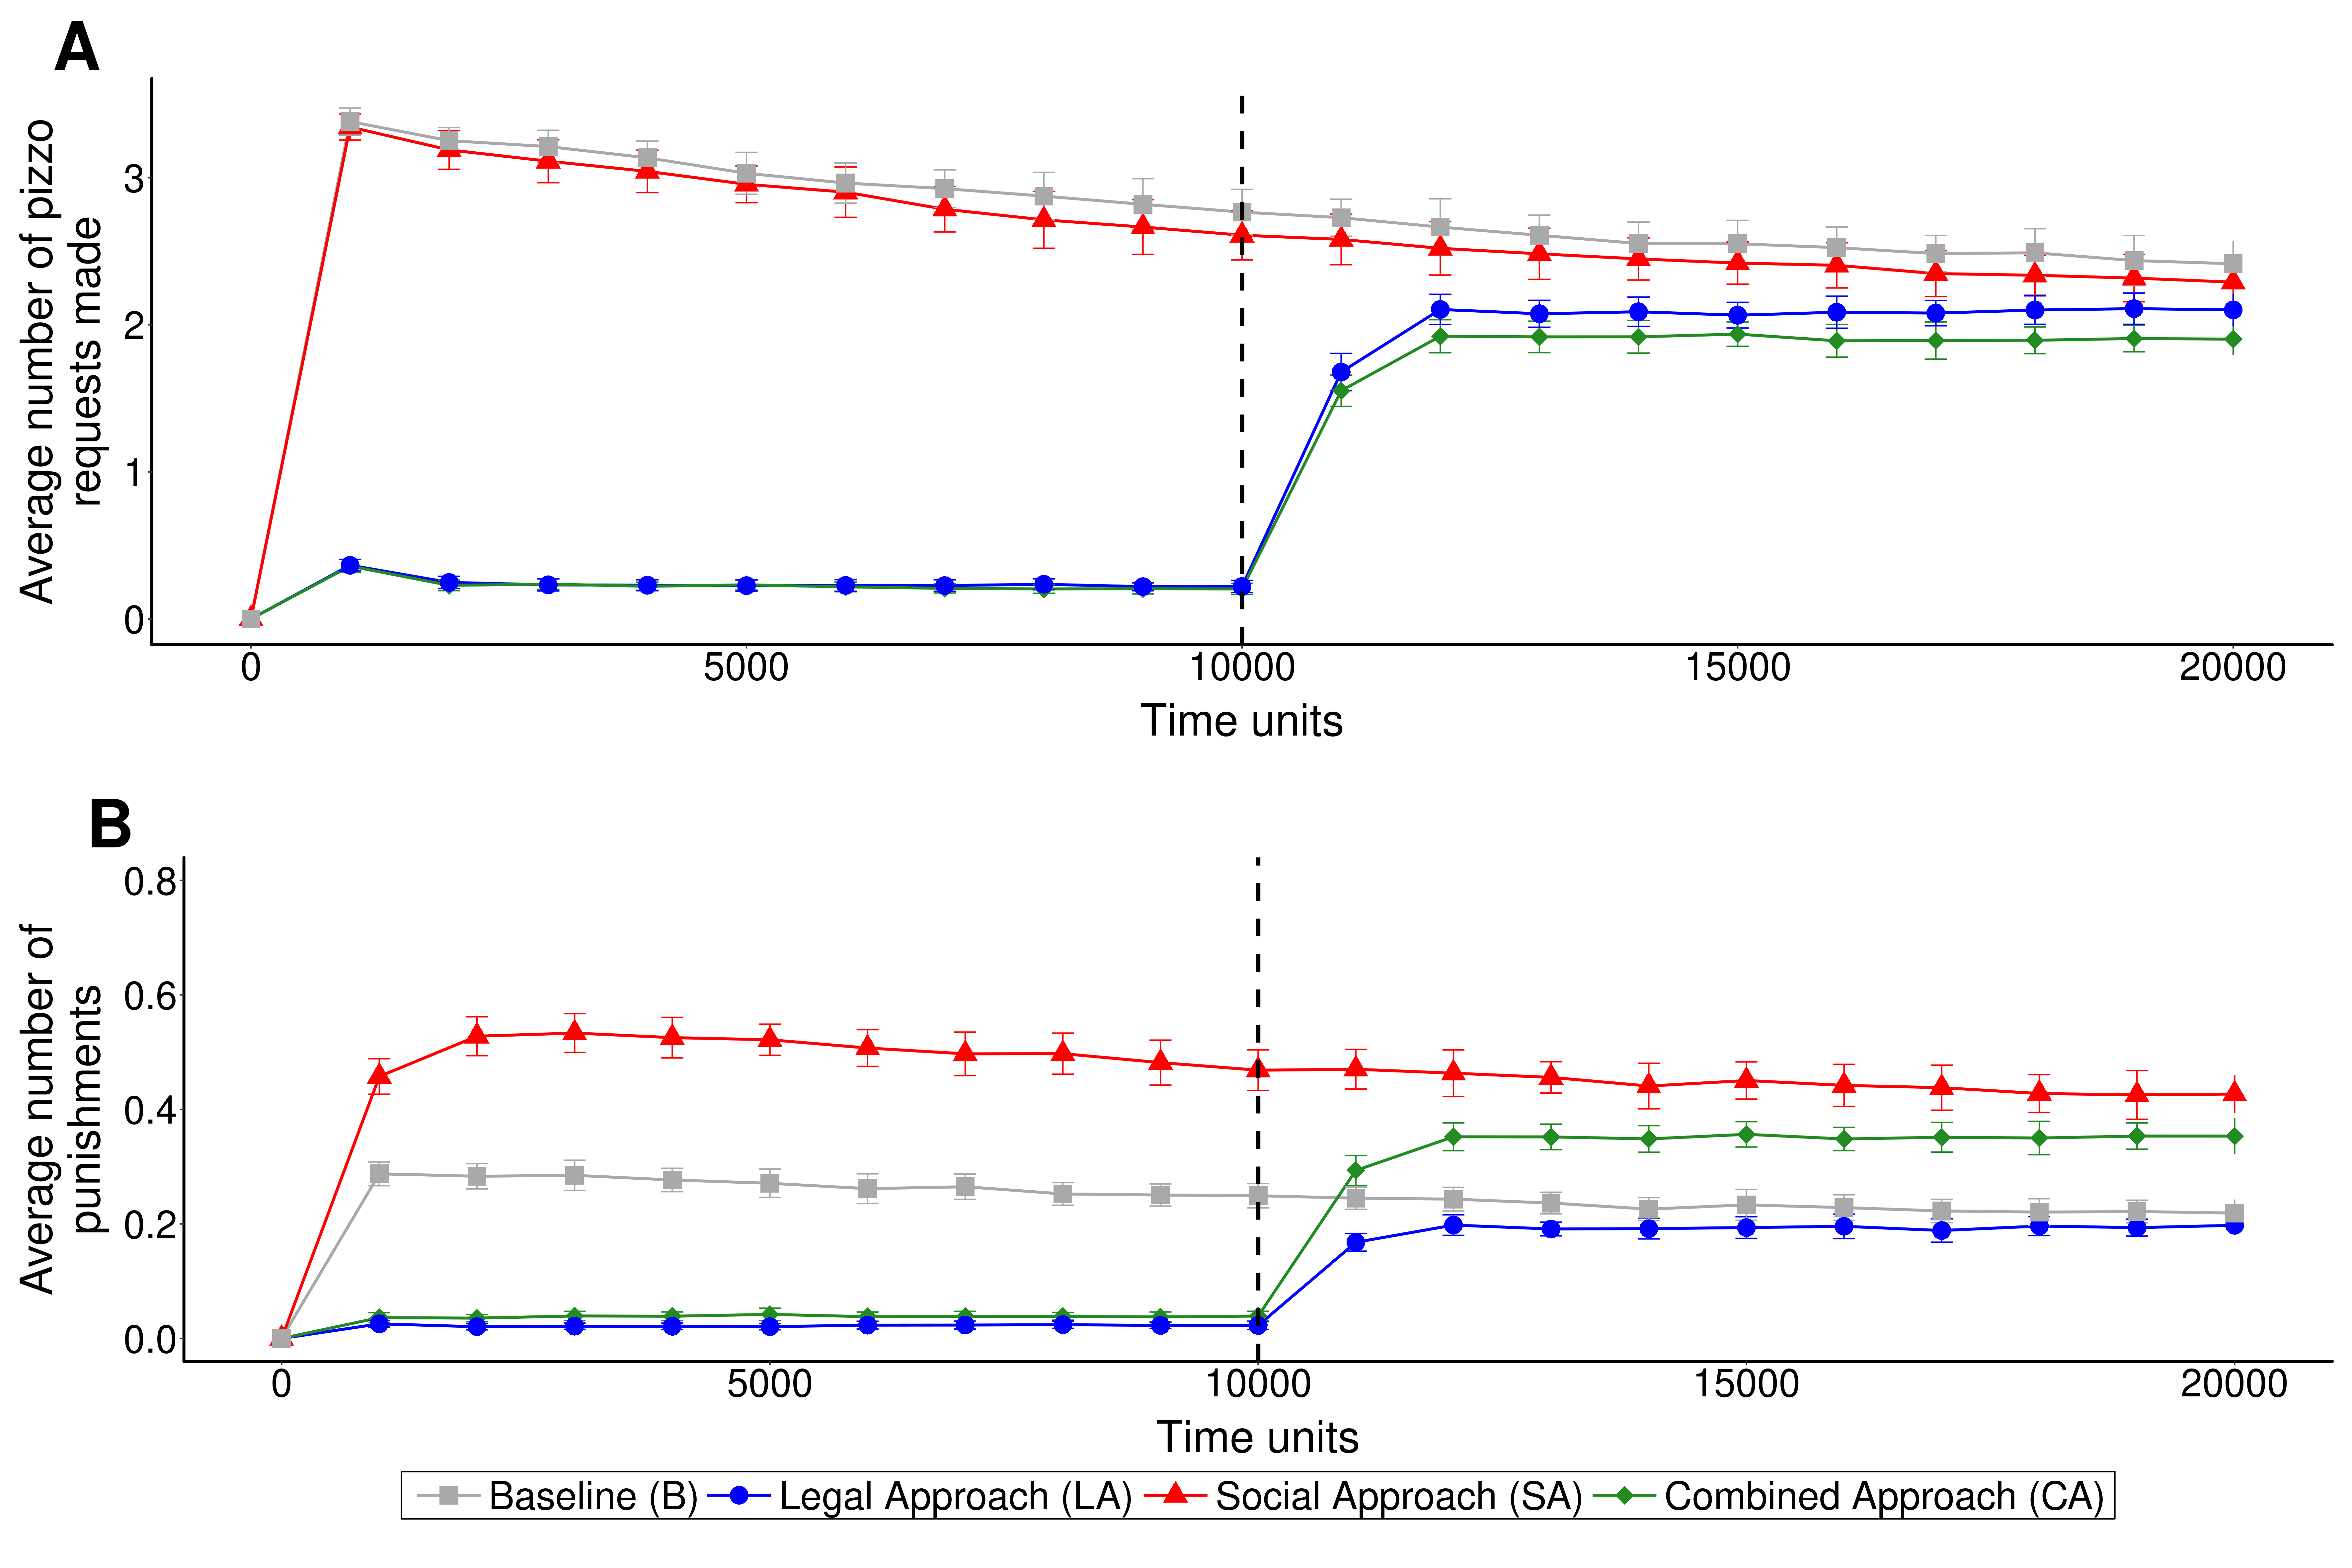


Figure S.2. Actions of the Mafia. Means plotted and error bars indicate ±1 standard deviation. The number of (A) pizzo requests made by Mafiosi and (B) punishments inflicted upon Entrepreneurs. The dashed line indicates the change to baseline parameters.


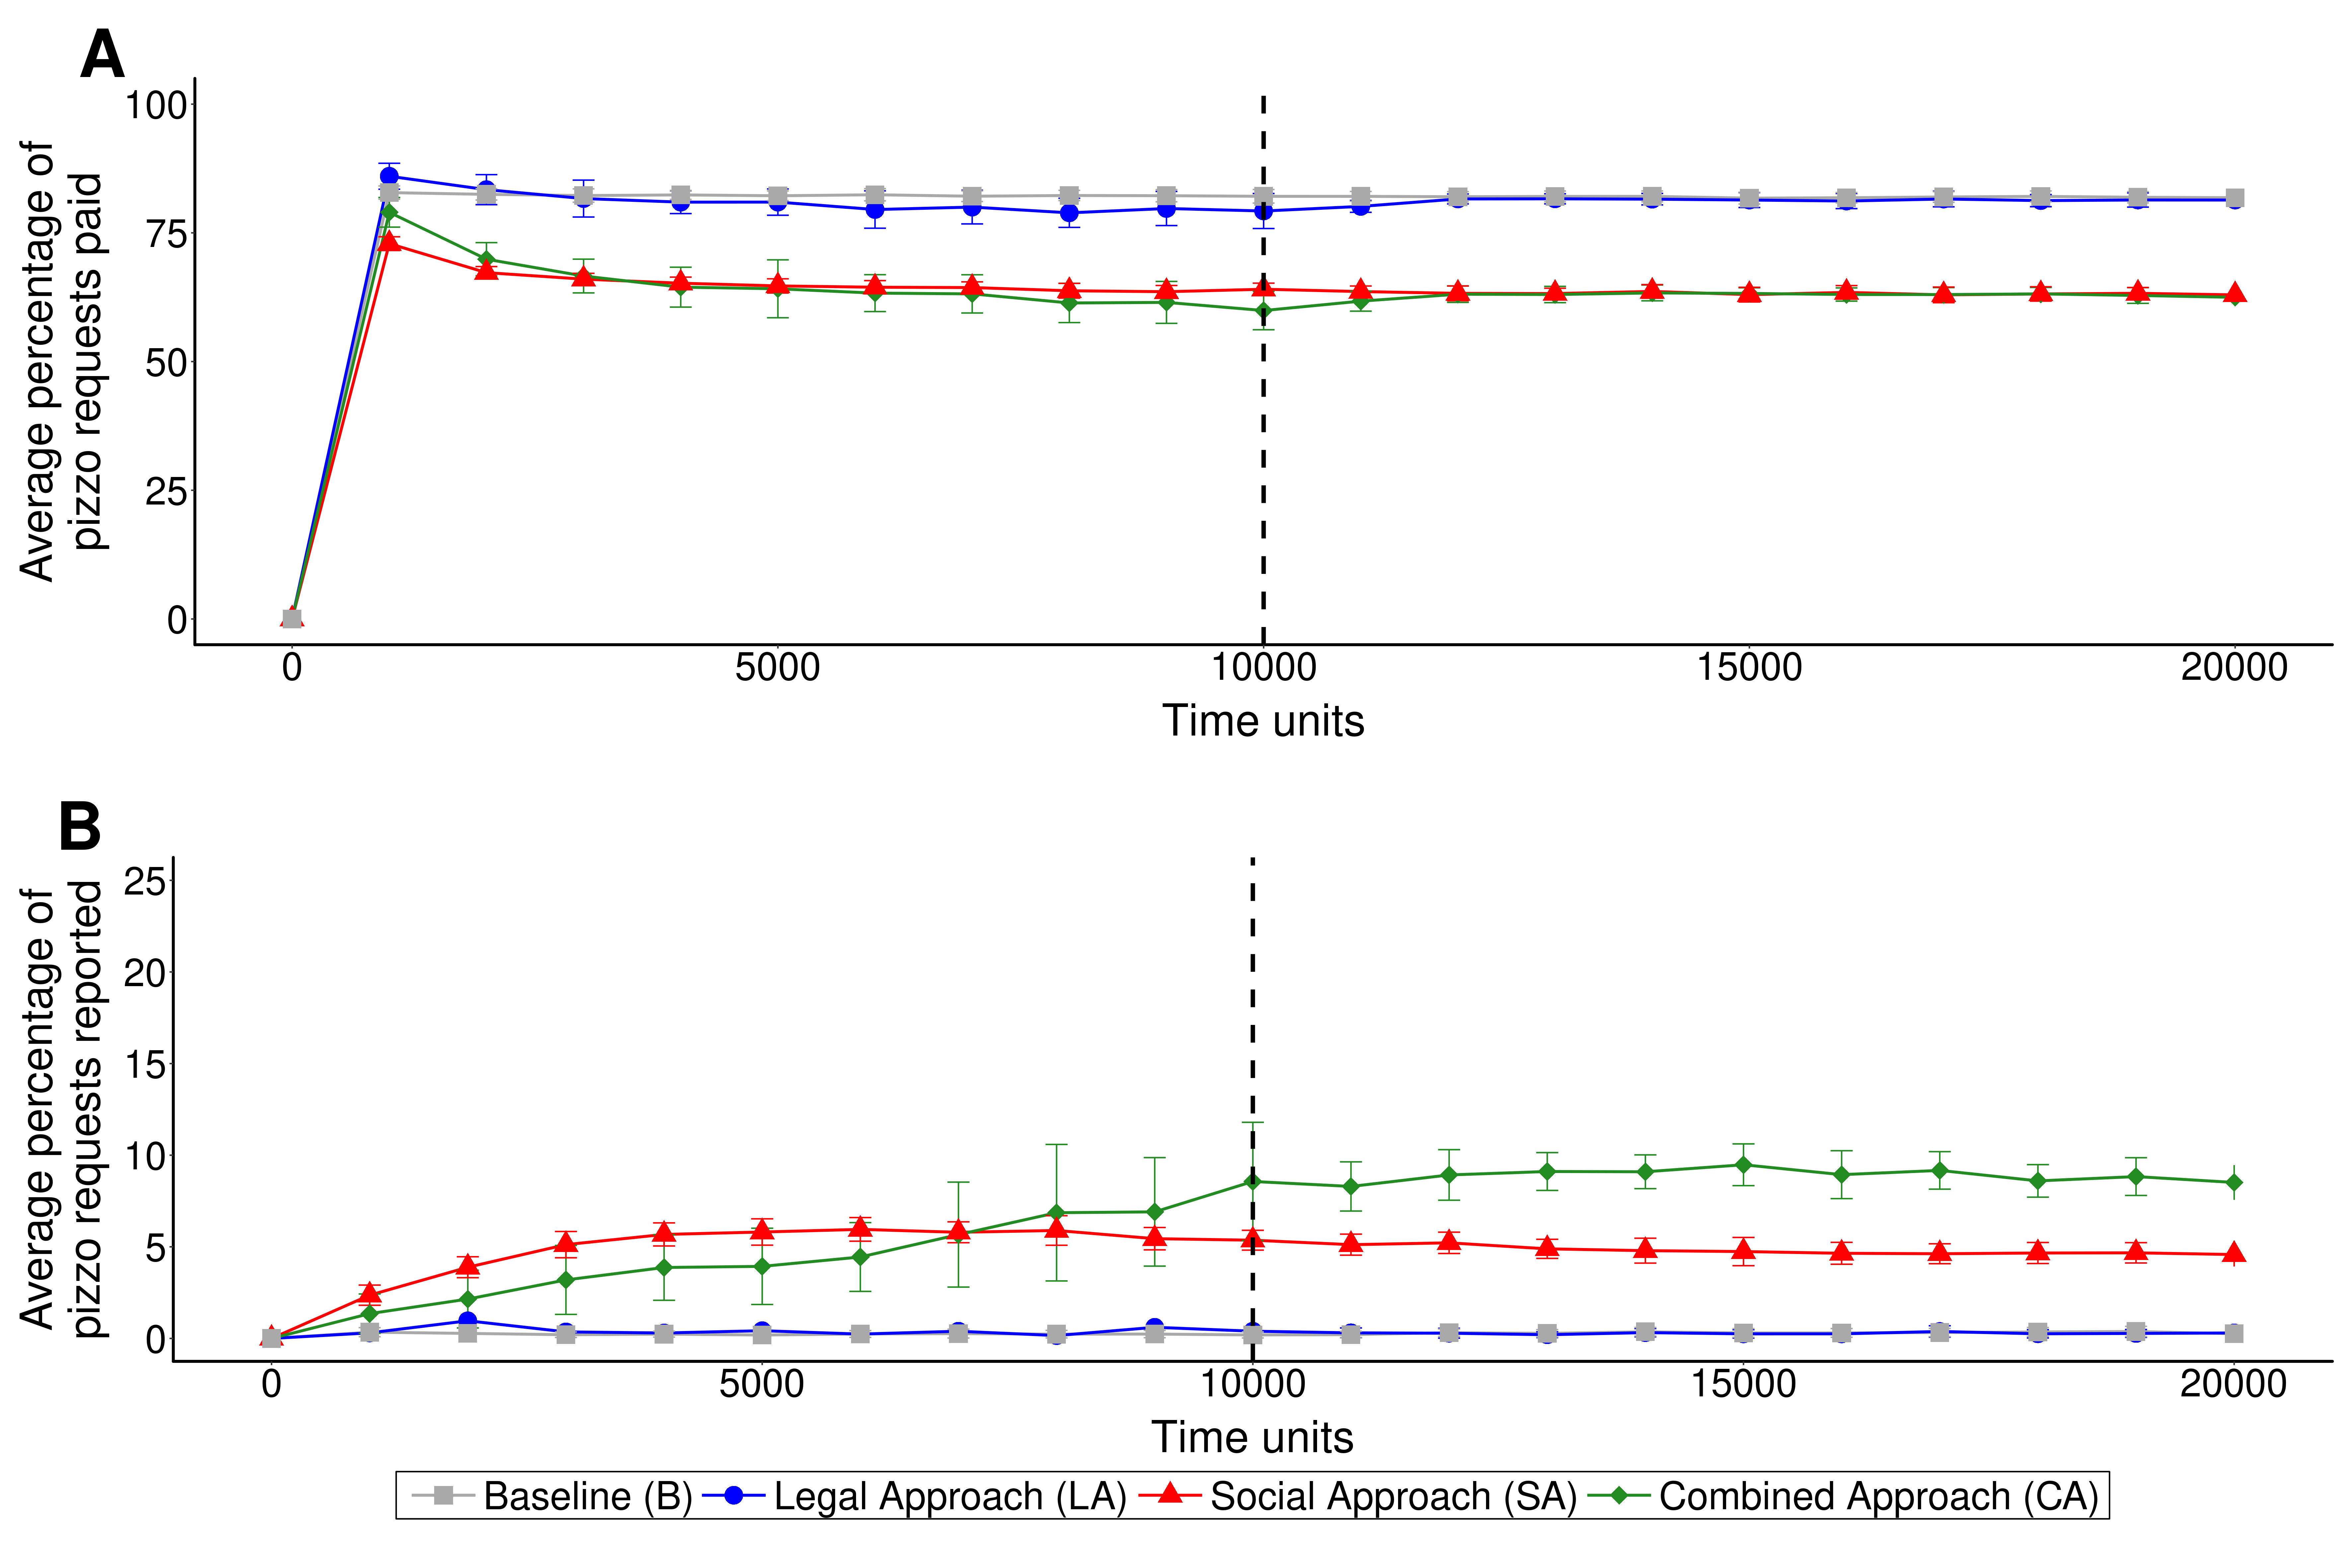


Figure S.3. Entrepreneurs’ actions. Means plotted and error bars indicate ±1 standard deviation. The (A) proportion of pizzo requests paid and (B) reported in each treatment. The dashed line indicates the change to baseline parameters.


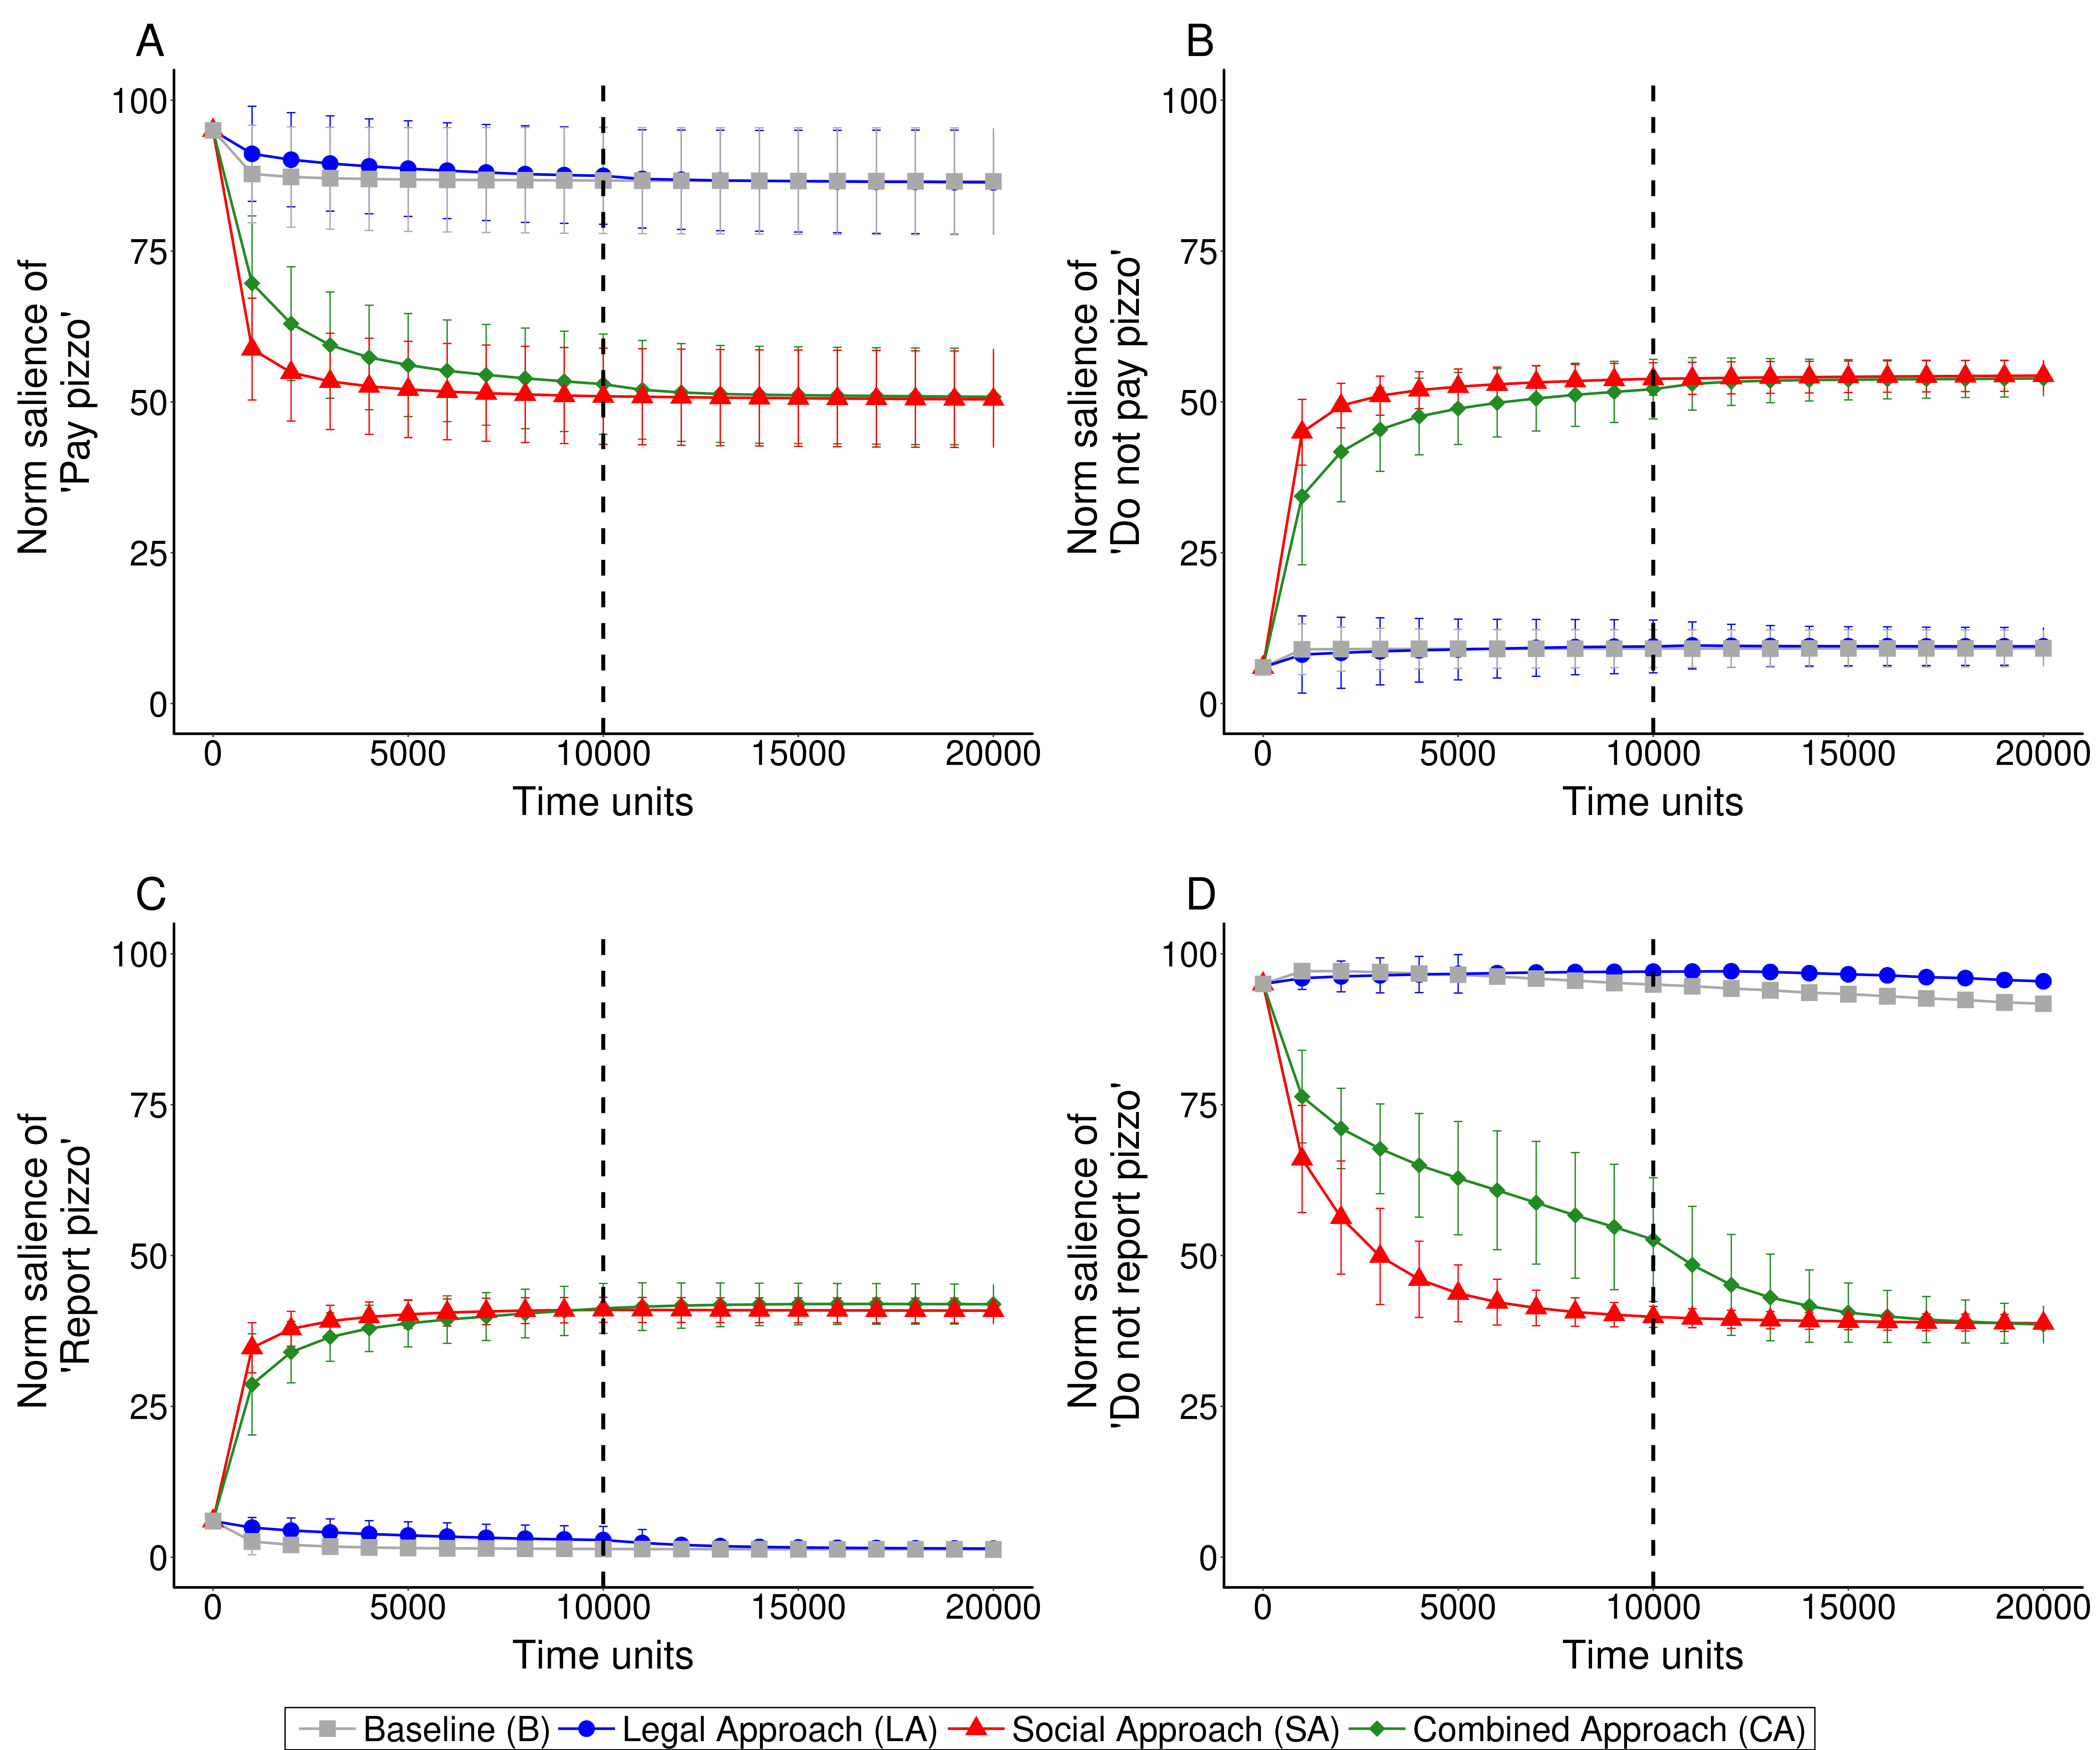


Figure S.4. Social norm importance in the population. Means plotted and error bars indicate ±1 standard deviation. Saliences of the social norm (A) pay pizzo, (B) do not pay pizzo, (C) report pizzo, and (D) do not report pizzo. The dashed line indicates the change to baseline parameters.

Andrighetto, G., Brandts, J., Conte, R., Sabater-Mir, J., Solaz, H., & Villatoro, D. (2013). Punish and Voice: Punishment Enhances Cooperation when Combined with Norm-Signalling. *PLOS ONE*, *8*(6), e64941. https://doi.org/10.1371/journal.pone.0064941

Arlacchi, P. (1988). *Mafia Business: The Mafia Ethic and the Spirit of Capitalism*. (M. Ryle, Trans.). Oxford: Oxford University Press.

Blok, A. (1974). *The Mafia of a Sicilian village, 1860-1960: a study of violent peasant entrepreneurs*.

Conte, R., Andrighetto, G., & Campennì, M. (Eds.). (2013). *Minding norms: Mechanisms and dynamics of social order in agent societies*. New York, NY: Oxford University Press USA.

Gambetta, D. (1988). Fragments of an economic theory of the mafia. *European Journal of Sociology / Archives Européennes de Sociologie*, *29*(01), 127–145. https://doi.org/10.1017/S0003975600005610

Gambetta, D. (1993). *The Sicilian Mafia: The Business of Private Protection* (New Ed edition). Cambridge, Mass.: Harvard University Press.

Hess, H. (1973). *Mafia & Mafiosi: The Structure of Power*. Saxon House.

Müller, B., Bohn, F., Dreßler, G., Groeneveld, J., Klassert, C., Martin, R., … Schwarz, N. (2013). Describing human decisions in agent-based models – ODD + D, an extension of the ODD protocol. *Environmental Modelling and Software*, *Complete*(48), 37–48. https://doi.org/10.1016/j.envsoft.2013.06.003

Nardin, L. G., Andrighetto, G., Conte, R., Székely, Á., Anzola, D., Elsenbroich, C., … Troitzsch, K. G. (2016). Simulating protection rackets: a case study of the Sicilian Mafia. *Autonomous Agents and Multi-Agent Systems*, 1–31. https://doi.org/10.1007/s10458-016-9330-z

Nardin, L. G., Andrighetto, G., Székely, Á., & Troitzsch, K. G. (2015, September 30). D 3.4 Simulator GLODERS-S. Retrieved from http://www.gloders.eu/images/Deliverables/GLODERS_D3-4.pdf

Paoli, L. (2003). *Mafia brotherhoods: Organized crime, Italian style*. New York, NY: Oxford University Press.

Realpe-Gómez, J., Andrighetto, G., Nardin, L. G., & Montoya, J. A. (2018). Balancing selfishness and norm conformity can explain human behavior in large-scale prisoner’s dilemma games and can poise human groups near criticality. *Physical Review E*, *97*(4), 042321. https://doi.org/10.1103/PhysRevE.97.042321

Sartor, Kaspers, T., Neumann, M., Lotzmann, U., Mohring, M., & Troitzsch, K. G. (2015). D 2.3 Consolidated database of ERS documentation. Surrey: GLODERS Consortium.

Schelling, T. C. (1971). What is the business of organized crime. *Journal of Public Law*, *20*, 71–84.

Schneider, J., & Schneider, P. (1976). *Culture and Political Economy in Western Sicily*. New York: Academic Press Inc.

Schneider, J., & Schneider, P. (2005). Mafia, Antimafia, and the Plural Cultures of Sicily. *Current Anthropology*, *46*(4), 501–520. https://doi.org/10.1086/431529
